# Supplementary material
Source: Springer Nature journal article supplement (https://www.springermedizin.de/resource/supplementary/13550_2013_158_MOESM5_ESM.pdf/9687720)

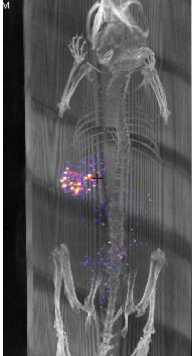

$^{99m}\text{Tc}$ -Ch-DTPA 22 hours

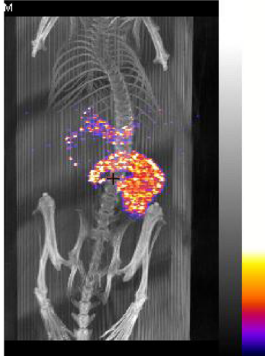

$^{99m}\text{Tc}$ -Ch-DTPA 22 hours with Loperamide

Supplement: MOESM5 [file 9687720]
